# Supplementary material for: The influence of organic bases and substituted groups on coordination structures affording two mononuclear Dy(iii) single-molecule magnets (SMMs) and a novel Dy(iii)–K(i) compound with unusually coordinated fluorine atoms
Source: Royal Society of Chemistry journal article supplement (doi:10.1039/d1ce00431j), 2021-01-01
Supplement: d1ce00431j1.pdf [file d1ce00431j1.pdf]

**The influence of organic bases and substituted groups upon coordination structures affording two mononuclear Dy (III) single-molecule magnets (SMMs) and a novel Dy (III)-K (I) compound with unusual coordinated fluorine atoms**

Nan Shen,<sup>a#</sup> Jing Liang,<sup>d#</sup> Xiaoni Qu,<sup>e</sup> Liu Sha,<sup>a</sup> Lin Zhu,<sup>a</sup> Sheng Zhang,<sup>\*a</sup> Ling Chen,<sup>\*d</sup> Jiangwei Zhang,<sup>c</sup> Dengwei Hu,<sup>a</sup> Bing Yin<sup>\*b</sup>

**AUTHOR ADDRESS**

---

- a. Faculty of Chemistry and Chemical Engineering, Engineering Research Center of Advanced Ferroelectric Functional Materials, Key Laboratory of Phytochemistry of Shaanxi Province, Baoji University of Arts and Sciences, 1 Hi-Tech Avenue, Baoji, Shaanxi, 721013, China*
  - b. Key Laboratory of Synthetic and Natural Functional Molecule Chemistry of Ministry of Education, College of Chemistry and Materials Science, Northwest University, Xi'an, Shaanxi 710069, China*
  - c. State Key Laboratory of Catalysis, Dalian Institute of Chemical Physics, Chinese Academy of Sciences (CAS) Dalian 116023, P.R.China*
  - d. Shannxi Provincial Cancer Hospital, Xi'an 710069, China*
  - e. College of Environment and Chemistry Engineering, Xi'an Polytechnic University, Xi'an 710048, P. R China.*
- 

<sup>#</sup>These authors contributed equally to this work.

**Corresponding Authors**

**\*E-mail: zhangsheng19890501@163.com. (S. Zhang)**

**\*E-mail: rayinyin@nwu.edu.cn. (B. Yin)**

**\*E-mail: 27376231@qq.com (C. Chen)**

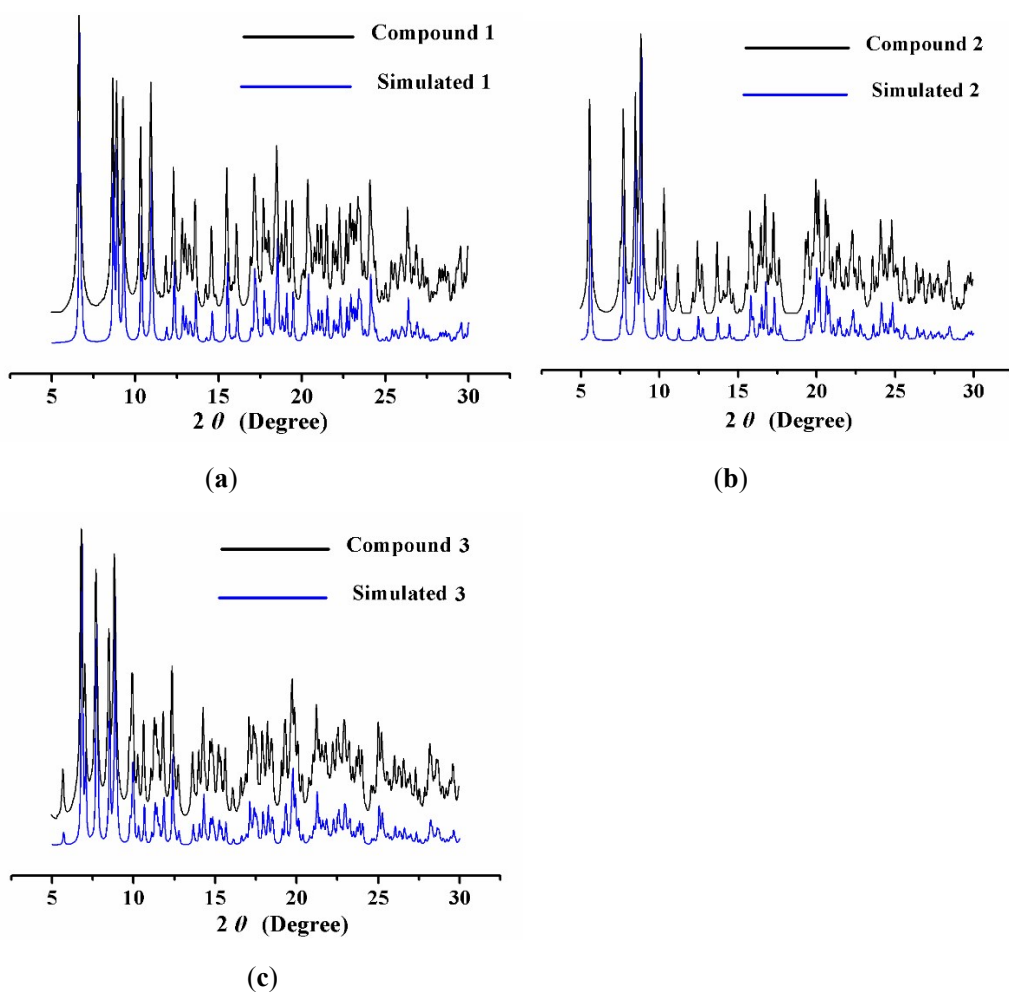

**Fig. S1** XRPD curves of **1-3** (a to c).

**Table S1** Bond lengths and bond angles for **1**.

| <b>1</b>        |           |                 |          |
|-----------------|-----------|-----------------|----------|
| Dy(1)-O(6)      | 2.313(9)  | O(6)-Dy(1)-O(3) | 74.2(3)  |
| Dy(1)-O(4)      | 2.319(10) | O(4)-Dy(1)-O(3) | 72.0(3)  |
| Dy(1)-O(2)      | 2.328(9)  | O(2)-Dy(1)-O(3) | 73.9(3)  |
| Dy(1)-O(5)      | 2.329(9)  | O(5)-Dy(1)-O(3) | 133.4(3) |
| Dy(1)-O(1)      | 2.331(8)  | O(1)-Dy(1)-O(3) | 126.3(3) |
| Dy(1)-O(3)      | 2.346(9)  | O(6)-Dy(1)-N(1) | 100.7(3) |
| Dy(1)-N(1)      | 2.519(10) | O(4)-Dy(1)-N(1) | 145.1(3) |
| Dy(1)-N(2)      | 2.530(10) | O(2)-Dy(1)-N(1) | 87.8(3)  |
| O(6)-Dy(1)-O(4) | 87.2(3)   | O(5)-Dy(1)-N(1) | 75.3(3)  |
| O(6)-Dy(1)-O(2) | 136.7(3)  | O(1)-Dy(1)-N(1) | 75.0(3)  |
| O(4)-Dy(1)-O(2) | 109.6(3)  | O(3)-Dy(1)-N(1) | 142.8(3) |
| O(6)-Dy(1)-O(5) | 72.1(3)   | O(6)-Dy(1)-N(2) | 75.8(3)  |
| O(4)-Dy(1)-O(5) | 75.0(3)   | O(4)-Dy(1)-N(2) | 150.6(3) |
| O(2)-Dy(1)-O(5) | 149.8(3)  | O(2)-Dy(1)-N(2) | 70.7(3)  |
| O(6)-Dy(1)-O(1) | 151.3(3)  | O(5)-Dy(1)-N(2) | 120.2(3) |

|                 |         |                 |          |
|-----------------|---------|-----------------|----------|
| O(4)-Dy(1)-O(1) | 81.9(3) | O(1)-Dy(1)-N(2) | 123.7(3) |
| O(2)-Dy(1)-O(1) | 72.0(3) | O(3)-Dy(1)-N(2) | 80.3(3)  |
| O(5)-Dy(1)-O(1) | 79.4(3) | N(1)-Dy(1)-N(2) | 63.0(3)  |

**Table S2** Bond lengths and bond angles for **2**.

| <b>2</b>            |            |                                      |            |
|---------------------|------------|--------------------------------------|------------|
| Dy1-K1              | 3.9419(7)  | F4-K1-F4 <sup>1</sup>                | 180        |
| Dy1-O1              | 2.347(6)   | F10-K1-F2                            | 118.9(2)   |
| Dy1-O2              | 2.350(7)   | F10-K1-F2 <sup>1</sup>               | 61.1(2)    |
| Dy1-O3              | 2.388(7)   | F10 <sup>1</sup> -K1-F2              | 61.1(2)    |
| Dy1-O4              | 2.336(7)   | F10 <sup>1</sup> -K1-F2 <sup>1</sup> | 118.9(2)   |
| Dy1-O5              | 2.370(8)   | F10-K1-F4 <sup>1</sup>               | 59.2(2)    |
| Dy1-O6              | 2.315(8)   | F10 <sup>1</sup> -K1-F4 <sup>1</sup> | 120.8(2)   |
| Dy1-O7              | 2.379(7)   | F10-K1-F4                            | 120.8(2)   |
| Dy1-O8              | 2.318(7)   | F10 <sup>1</sup> -K1-F4              | 59.2(2)    |
| K1-F2 <sup>1</sup>  | 2.983(7)   | F10 <sup>1</sup> -K1-F10             | 180        |
| K1-F2               | 2.983(7)   | O1 <sup>1</sup> -K1-F2 <sup>1</sup>  | 56.11(18)  |
| K1-F4 <sup>1</sup>  | 3.023(8)   | O1 <sup>1</sup> -K1-F2               | 123.89(18) |
| K1-F4               | 3.023(8)   | O1-K1-F2                             | 56.11(18)  |
| K1-F10              | 2.939(7)   | O1-K1-F2 <sup>1</sup>                | 123.89(18) |
| K1-F10 <sup>1</sup> | 2.939(7)   | O1 <sup>1</sup> -K1-F4               | 74.4(2)    |
| K1-O1 <sup>1</sup>  | 2.777(7)   | O1-K1-F4 <sup>1</sup>                | 74.4(2)    |
| K1-O1               | 2.777(7)   | O1 <sup>1</sup> -K1-F4 <sup>1</sup>  | 105.6(2)   |
| K1-O3 <sup>1</sup>  | 2.936(7)   | O1-K1-F4                             | 105.6(2)   |
| K1-O3               | 2.936(7)   | O1-K1-F10                            | 106.6(2)   |
| K1-O7 <sup>1</sup>  | 2.831(7)   | O1 <sup>1</sup> -K1-F10 <sup>1</sup> | 106.6(2)   |
| K1-O7               | 2.831(7)   | O1 <sup>1</sup> -K1-F10              | 73.4(2)    |
| O1-Dy1-K1           | 43.88(17)  | O1-K1-F10 <sup>1</sup>               | 73.4(2)    |
| O1-Dy1-O2           | 72.8(2)    | O1 <sup>1</sup> -K1-O1               | 180        |
| O1-Dy1-O3           | 76.6(3)    | O1 <sup>1</sup> -K1-O3               | 118.2(2)   |
| O1-Dy1-O5           | 113.4(3)   | O1-K1-O3                             | 61.8(2)    |
| O1-Dy1-O7           | 79.4(2)    | O1 <sup>1</sup> -K1-O3 <sup>1</sup>  | 61.8(2)    |
| O2-Dy1-K1           | 99.85(17)  | O1-K1-O3 <sup>1</sup>                | 118.3(2)   |
| O2-Dy1-O3           | 80.2(3)    | O1 <sup>1</sup> -K1-O7               | 114.8(2)   |
| O2-Dy1-O5           | 73.6(3)    | O1-K1-O7 <sup>1</sup>                | 114.8(2)   |
| O2-Dy1-O7           | 145.1(2)   | O1-K1-O7                             | 65.2(2)    |
| O3-Dy1-K1           | 47.90(16)  | O1 <sup>1</sup> -K1-O7 <sup>1</sup>  | 65.2(2)    |
| O4-Dy1-K1           | 119.02(18) | O31-K1-F2 <sup>1</sup>               | 109.4(2)   |
| O4-Dy1-O1           | 139.2(3)   | O3-K1-F2                             | 109.44(19) |
| O4-Dy1-O2           | 76.6(2)    | O3-K1-F2 <sup>1</sup>                | 70.56(19)  |
| O4-Dy1-O3           | 72.1(2)    | O3 <sup>1</sup> -K1-F2               | 70.56(19)  |
| O4-Dy1-O5           | 82.2(3)    | O3 <sup>1</sup> -K1-F4               | 128.22(19) |

|                                     |            |                                      |            |
|-------------------------------------|------------|--------------------------------------|------------|
| O4-Dy1-O7                           | 114.5(3)   | O3-K1-F4                             | 51.77(19)  |
| O5-Dy1-K1                           | 156.4(2)   | O3-K1-F4 <sup>1</sup>                | 128.23(19) |
| O5-Dy1-O3                           | 146.8(3)   | O3 <sup>1</sup> -K1-F4 <sup>1</sup>  | 51.77(19)  |
| O5-Dy1-O7                           | 138.5(3)   | O3-K1-F10                            | 107.41(19) |
| O6-Dy1-K1                           | 90.82(19)  | O3 <sup>1</sup> -K1-F10 <sup>1</sup> | 107.41(19) |
| O6-Dy1-O1                           | 73.1(3)    | O3 <sup>1</sup> -K1-F10              | 72.59(19)  |
| O6-Dy1-O2                           | 115.8(3)   | O3-K1-F10 <sup>1</sup>               | 72.59(19)  |
| O6-Dy1-O3                           | 138.6(3)   | O3 <sup>1</sup> -K1-O3               | 180        |
| O6-Dy1-O4                           | 146.2(3)   | O7 <sup>1</sup> -K1-F2 <sup>1</sup>  | 114.2(2)   |
| O6-Dy1-O5                           | 72.7(3)    | O7 <sup>1</sup> -K1-F2               | 65.8(2)    |
| O6-Dy1-O7                           | 74.2(3)    | O7-K1-F2 <sup>1</sup>                | 65.8(2)    |
| O6-Dy1-O8                           | 80.4(3)    | O7-K1-F2                             | 114.2(2)   |
| O7-Dy1-K1                           | 45.33(16)  | O7 <sup>1</sup> -K1-F4               | 79.1(2)    |
| O7-Dy1-O3                           | 73.0(2)    | O7 <sup>1</sup> -K1-F4 <sup>1</sup>  | 100.9(2)   |
| O8-Dy1-K1                           | 116.87(17) | O7-K1-F4 <sup>1</sup>                | 79.1(2)    |
| O8-Dy1-O1                           | 145.6(3)   | O7-K1-F4                             | 100.9(2)   |
| O8-Dy1-O2                           | 140.1(2)   | O7 <sup>1</sup> -K1-F10              | 126.56(18) |
| O8-Dy1-O3                           | 112.4(3)   | O7 <sup>1</sup> -K1-F10 <sup>1</sup> | 53.44(18)  |
| O8-Dy1-O4                           | 72.4(3)    | O7-K1-F10 <sup>1</sup>               | 126.56(18) |
| O8-Dy1-O5                           | 77.8(3)    | O7-K1-F10                            | 53.44(18)  |
| O8-Dy1-O7                           | 72.5(2)    | O7-K1-O3 <sup>1</sup>                | 121.1(2)   |
| F2-K1-F2 <sup>1</sup>               | 180        | O7-K1-O3                             | 58.9(2)    |
| F2-K1-F4 <sup>1</sup>               | 59.7(2)    | O7 <sup>1</sup> -K1-O3 <sup>1</sup>  | 58.9(2)    |
| F2 <sup>1</sup> -K1-F4              | 59.7(2)    | O7 <sup>1</sup> -K1-O3               | 121.1(2)   |
| F2-K1-F4                            | 120.3(2)   | O7 <sup>1</sup> -K1-O7               | 180        |
| F2 <sup>1</sup> -K1-F4 <sup>1</sup> | 120.3(2)   |                                      |            |

**Table S3** Bond lengths and bond angles for **3**.

| <b>3</b>    |          |                   |          |
|-------------|----------|-------------------|----------|
| Dy(1)-O(1)  | 2.296(7) | O(2)-Dy(1)-N(2)   | 71.0(3)  |
| Dy(1)-O(3)  | 2.302(7) | O(5)-Dy(1)-N(2)   | 83.7(3)  |
| Dy(1)-O(6)  | 2.308(8) | O(1)-Dy(1)-N(1)   | 74.9(3)  |
| Dy(1)-O(4)  | 2.311(7) | O(3)-Dy(1)-N(1)   | 135.4(3) |
| Dy(1)-O(2)  | 2.318(7) | O(4)-Dy(1)-N(1)   | 149.4(3) |
| Dy(1)-O(5)  | 2.364(7) | O(6)-Dy(1)-N(1)   | 82.6(2)  |
| Dy(1)-N(2)  | 2.554(8) | O(2)-Dy(1)-N(1)   | 114.4(3) |
| Dy(1)-N(1)  | 2.590(7) | O(5)-Dy(1)-N(1)   | 72.1(3)  |
| Dy(2)-O(10) | 2.301(8) | O(10)-Dy(2)-O(12) | 82.0(3)  |
| Dy(2)-O(12) | 2.330(8) | O(10)-Dy(2)-O(11) | 81.8(3)  |
| Dy(2)-O(11) | 2.318(9) | O(12)-Dy(2)-O(11) | 71.9(3)  |
| Dy(2)-O(9)  | 2.327(9) | O(10)-Dy(2)-O(9)  | 73.2(3)  |
| Dy(2)-O(8)  | 2.320(7) | O(12)-Dy(2)-O(9)  | 143.1(3) |
| Dy(2)-O(7)  | 2.381(8) | O(11)-Dy(2)-O(9)  | 77.8(3)  |

|                 |          |                  |          |
|-----------------|----------|------------------|----------|
| Dy(2)-N(6)      | 2.543(9) | O(10)-Dy(2)-O(8) | 74.3(3)  |
| Dy(2)-N(5)      | 2.551(8) | O(12)-Dy(2)-O(8) | 74.2(3)  |
| O(1)-Dy(1)-O(3) | 143.5(3) | O(11)-Dy(2)-O(8) | 140.7(3) |
| O(1)-Dy(1)-O(6) | 79.4(3)  | O(9)-Dy(2)-O(8)  | 122.5(3) |
| O(3)-Dy(1)-O(6) | 118.3(3) | O(10)-Dy(2)-O(7) | 103.4(3) |
| O(1)-Dy(1)-O(4) | 83.2(3)  | O(12)-Dy(2)-O(7) | 141.8(3) |
| O(3)-Dy(1)-O(4) | 73.8(3)  | O(11)-Dy(2)-O(7) | 146.1(3) |
| O(4)-Dy(1)-O(6) | 72.5(3)  | O(9)-Dy(2)-O(7)  | 72.0(3)  |
| O(1)-Dy(1)-O(2) | 72.1(2)  | O(8)-Dy(2)-O(7)  | 71.2(3)  |
| O(3)-Dy(1)-O(2) | 75.4(3)  | O(10)-Dy(2)-N(6) | 145.7(3) |
| O(4)-Dy(1)-O(2) | 77.5(3)  | O(12)-Dy(2)-N(6) | 111.1(3) |
| O(6)-Dy(1)-O(2) | 140.6(3) | O(11)-Dy(2)-N(6) | 73.2(3)  |
| O(1)-Dy(1)-O(5) | 138.8(2) | O(9)-Dy(2)-N(6)  | 78.8(3)  |
| O(3)-Dy(1)-O(5) | 77.5(3)  | O(8)-Dy(2)-N(6)  | 139.0(3) |
| O(4)-Dy(1)-O(5) | 115.1(3) | O(7)-Dy(2)-N(6)  | 85.9(3)  |
| O(6)-Dy(1)-O(5) | 72.6(3)  | O(10)-Dy(2)-N(5) | 149.3(3) |
| O(2)-Dy(1)-O(5) | 145.2(3) | O(12)-Dy(2)-N(5) | 77.2(3)  |
| O(1)-Dy(1)-N(2) | 103.1(3) | O(11)-Dy(2)-N(5) | 112.1(3) |
| O(3)-Dy(1)-N(2) | 81.4(3)  | O(9)-Dy(2)-N(5)  | 135.2(3) |
| O(4)-Dy(1)-N(2) | 143.9(3) | O(8)-Dy(2)-N(5)  | 78.4(3)  |
| O(6)-Dy(1)-N(2) | 143.5(3) | O(7)-Dy(2)-N(5)  | 80.6(3)  |

**Table S4** Dy<sup>III</sup> ion geometry analysis by SHAPE 2.1 software.

| Configuration                                           | ABOXIY,<br>1 | ABOXIY,<br>2 | ABOXIY,<br>3Dy1 | ABOXIY,<br>3Dy2 |
|---------------------------------------------------------|--------------|--------------|-----------------|-----------------|
| Octagon(D8h)                                            | 30.583       | 29.707       | 30.961          | 31.484          |
| Heptagonal pyramid(C7v)                                 | 23.031       | 23.736       | 21.180          | 23.014          |
| Hexagonal bipyramid(D6h)                                | 13.824       | 15.949       | 15.004          | 16.236          |
| Cube(Oh)                                                | 7.452        | 8.592        | 8.965           | 9.768           |
| Square antiprism ( $D_{4d}$ )                           | 1.552        | 0.247        | 0.740           | 0.910           |
| Triangular dodecahedron ( $D_{2d}$ )                    | 0.702        | 2.269        | 1.811           | 1.730           |
| Johnson gyrobifastigium J26 ( $D_{2d}$ )                | 15.424       | 16.286       | 15.406          | 15.113          |
| Johnson elongated triangular bipyramid J14 ( $D_{3h}$ ) | 28.336       | 29.181       | 27.911          | 28.116          |
| Biaugmented trigonal prism J50 ( $C_{2v}$ )             | 2.832        | 2.926        | 2.482           | 2.455           |
| Biaugmented trigonal prism ( $C_{2v}$ )                 | 2.241        | 2.341        | 2.043           | 1.605           |
| Snub sphenoid J84 ( $D_{2d}$ )                          | 3.798        | 5.390        | 4.829           | 4.606           |
| Triakis tetrahedron(Td)                                 | 8.204        | 9.388        | 9.792           | 10.582          |

|                                          |        |        |        |        |
|------------------------------------------|--------|--------|--------|--------|
| Elongated trigonal bipyramid( $D_{3h}$ ) | 23.012 | 24.142 | 24.335 | 23.994 |
|------------------------------------------|--------|--------|--------|--------|

**Table S5** K (I) ion geometry analysis by SHAPE 2.1 software.

| Configuration                                          | ABOXIY, 2K |
|--------------------------------------------------------|------------|
| Dodecagon ( $D_{12h}$ )                                | 34.311     |
| Hendecagonal pyramid( $C_{11v}$ )                      | 28.356     |
| Decagonal bipyramid( $D_{10h}$ )                       | 15.497     |
| Hexagonal prism( $D_{6h}$ )                            | 8.298      |
| Hexagonal antiprism( $D_{6d}$ )                        | 14.369     |
| Truncated tetrahedron ( $T_d$ )                        | 13.237     |
| Cuboctahedron ( $O_h$ )                                | 2.979      |
| Anticuboctahedron J27( $D_{3h}$ )                      | 4.717      |
| Icosahedron ( $I_h$ )                                  | 2.069      |
| Johnson square cupola J4( $C_{4v}$ )                   | 20.489     |
| Johnson elongated pentagonal bipyramid J16( $D_{6h}$ ) | 7.932      |
| Biaugmented pentagonal prism J53( $C_{2v}$ )           | 13.200     |
| Sphenomegacorona J88( $C_s$ )                          | 17.658     |

-----  
-1-----

SHAPE v2.1 Continuous Shape Measures calculation  
(c) 2013 Electronic Structure Group, Universitat de Barcelona  
Contact: llunell@ub.edu  
-----

Dy structures

|          |        |                                            |
|----------|--------|--------------------------------------------|
| OP-8     | 1 D8h  | Octagon                                    |
| HPY-8    | 2 C7v  | Heptagonal pyramid                         |
| HBPY-8   | 3 D6h  | Hexagonal bipyramid                        |
| CU-8     | 4 Oh   | Cube                                       |
| SAPR-8   | 5 D4d  | Square antiprism                           |
| TDD-8    | 6 D2d  | Triangular dodecahedron                    |
| JGBF-8   | 7 D2d  | Johnson gyrobifastigium J26                |
| JETBPY-8 | 8 D3h  | Johnson elongated triangular bipyramid J14 |
| JBTPR-8  | 9 C2v  | Biaugmented trigonal prism J50             |
| BTPR-8   | 10 C2v | Biaugmented trigonal prism                 |
| JSD-8    | 11 D2d | Snub diphenoid J84                         |
| TT-8     | 12 Td  | Triakis tetrahedron                        |
| ETBPY-8  | 13 D3h | Elongated trigonal bipyramid               |

| Structure [ML8 ] | OP-8   | HPY-8   | HBPY-8   | CU-8    |
|------------------|--------|---------|----------|---------|
| SAPR-8           | TDD-8  | JGBF-8  | JETBPY-8 | JBTPR-8 |
| BTPR-8           | JSD-8  | TT-8    | ETBPY-8  |         |
| ABOXIY           | ,      | 30.583, | 23.031,  | 13.824, |
| 1.552,           | 0.702, | 15.424, | 28.336,  | 2.832,  |
| 3.798,           | 8.204, | 23.012  |          | 7.452,  |
|                  |        |         |          | 2.241,  |

## 2

-----  
 S H A P E v2.1 Continuous Shape Measures calculation  
 (c) 2013 Electronic Structure Group, Universitat de Barcelona  
 Contact: llunell@ub.edu  
 -----

### Dy structures

|          |        |                                            |
|----------|--------|--------------------------------------------|
| OP-8     | 1 D8h  | Octagon                                    |
| HPY-8    | 2 C7v  | Heptagonal pyramid                         |
| HBPY-8   | 3 D6h  | Hexagonal bipyramid                        |
| CU-8     | 4 Oh   | Cube                                       |
| SAPR-8   | 5 D4d  | Square antiprism                           |
| TDD-8    | 6 D2d  | Triangular dodecahedron                    |
| JGBF-8   | 7 D2d  | Johnson gyrobifastigium J26                |
| JETBPY-8 | 8 D3h  | Johnson elongated triangular bipyramid J14 |
| JBTPR-8  | 9 C2v  | Biaugmented trigonal prism J50             |
| BTPR-8   | 10 C2v | Biaugmented trigonal prism                 |
| JSD-8    | 11 D2d | Snub diphenoid J84                         |
| TT-8     | 12 Td  | Triakis tetrahedron                        |
| ETBPY-8  | 13 D3h | Elongated trigonal bipyramid               |

| Structure [ML8 ] | OP-8   | HPY-8   | HBPY-8   | CU-8    |
|------------------|--------|---------|----------|---------|
| SAPR-8           | TDD-8  | JGBF-8  | JETBPY-8 | JBTPR-8 |
| BTPR-8           | JSD-8  | TT-8    | ETBPY-8  |         |
| ABOXIY           | ,      | 29.707, | 23.736,  | 15.949, |
| 0.274,           | 2.269, | 16.286, | 29.181,  | 2.926,  |
| 5.390,           | 9.388, | 24.142  |          | 8.592,  |
|                  |        |         |          | 2.341,  |

-----  
 S H A P E v2.1 Continuous Shape Measures calculation  
 (c) 2013 Electronic Structure Group, Universitat de Barcelona  
 Contact: llunell@ub.edu  
 -----

## 2

-----  
 S H A P E v2.1 Continuous Shape Measures calculation

K structures

|           |        |                                            |
|-----------|--------|--------------------------------------------|
| DP-12     | 1 D12h | Dodecagon                                  |
| HPY-12    | 2 C11v | Heptagonal pyramid                         |
| DBPY-12   | 3 D10h | Decagonal bipyramid                        |
| HPR-12    | 4 D6h  | Hexagonal prism                            |
| HAPR-12   | 5 D6d  | Hexagonal antiprism                        |
| TT-12     | 6 Td   | Truncated tetrahedron                      |
| COC-12    | 7 Oh   | Cuboctahedron                              |
| ACOC-12   | 8 D3h  | Anticuboctahedron J27                      |
| IC-12     | 9 Ih   | Icosahedron                                |
| JSC-12    | 10 C4v | Johnson square cupola J4                   |
| JEPBPY-12 | 11 D6h | Johnson elongated pentagonal bipyramid J16 |
| JBAPPR-12 | 12 C2v | Biaugmented pentagonal prism J53           |
| JSPMC-12  | 13 Cs  | Sphenomegacorona J88                       |

| Structure [ML12] | DP-12     | HPY-12    | DBPY-12  | HPR-12  |
|------------------|-----------|-----------|----------|---------|
| HAPR-12          | TT-12     | COC-12    | ACOC-12  | IC-12   |
| JSC-12           | JEPBPY-12 | JBAPPR-12 | JSPMC-12 |         |
| ABOXIY           | ,         | 34.311,   | 28.356,  | 15.497, |
| 14.369,          | 13.237,   | 2.979,    | 4.717,   | 2.069,  |
| 7.932,           | 13.200,   | 17.658    |          | 8.298,  |
|                  |           |           |          | 20.489, |

---

S H A P E v2.1 Continuous Shape Measures calculation

3DY1

Dy structures

|          |        |                                            |
|----------|--------|--------------------------------------------|
| OP-8     | 1 D8h  | Octagon                                    |
| HPY-8    | 2 C7v  | Heptagonal pyramid                         |
| HBPY-8   | 3 D6h  | Hexagonal bipyramid                        |
| CU-8     | 4 Oh   | Cube                                       |
| SAPR-8   | 5 D4d  | Square antiprism                           |
| TDD-8    | 6 D2d  | Triangular dodecahedron                    |
| JGBF-8   | 7 D2d  | Johnson gyrobifastigium J26                |
| JETBPY-8 | 8 D3h  | Johnson elongated triangular bipyramid J14 |
| JBTPR-8  | 9 C2v  | Biaugmented trigonal prism J50             |
| BTPR-8   | 10 C2v | Biaugmented trigonal prism                 |



|         |        |                              |
|---------|--------|------------------------------|
| JSD-8   | 11 D2d | Snub diphenoïd J84           |
| TT-8    | 12 Td  | Triakis tetrahedron          |
| ETBPY-8 | 13 D3h | Elongated trigonal bipyramid |

| Structure [ML8 ] | OP-8   | HPY-8   | HBPY-8   | CU-8    |
|------------------|--------|---------|----------|---------|
| SAPR-8           | TDD-8  | JGBF-8  | JETBPY-8 | JBTPR-8 |
| BTPR-8           | JSD-8  | TT-8    | ETBPY-8  |         |
| ABOXIY           | ,      | 30.961, | 21.180,  | 15.004, |
| 0.740,           | 1.811, | 15.406, | 27.911,  | 2.482,  |
| 4.829,           | 9.792, | 24.335  |          | 8.965,  |
|                  |        |         |          | 2.043,  |

-----

S H A P E v2.1 Continuous Shape Measures calculation  
(c) 2013 Electronic Structure Group, Universitat de Barcelona  
Contact: llunell@ub.edu

-----

3DY2

Dy structures

|          |        |                                          |
|----------|--------|------------------------------------------|
| OP-8     | 1 D8h  | Octagon                                  |
| HPY-8    | 2 C7v  | Heptagonal pyramid                       |
| HBPY-8   | 3 D6h  | Hexagonal bipyramid                      |
| CU-8     | 4 Oh   | Cube                                     |
| SAPR-8   | 5 D4d  | Square antiprism                         |
| TDD-8    | 6 D2d  | Triangular dodecahedron                  |
| JGBF-8   | 7 D2d  | Johnson gyrobifastigium J26              |
| JETBPY-8 | 8 D3h  | Johnson elongated trigonal bipyramid J14 |
| JBTPR-8  | 9 C2v  | Biaugmented trigonal prism J50           |
| BTPR-8   | 10 C2v | Biaugmented trigonal prism               |
| JSD-8    | 11 D2d | Snub diphenoïd J84                       |
| TT-8     | 12 Td  | Triakis tetrahedron                      |
| ETBPY-8  | 13 D3h | Elongated trigonal bipyramid             |

| Structure [ML8 ] | OP-8    | HPY-8   | HBPY-8   | CU-8    |
|------------------|---------|---------|----------|---------|
| SAPR-8           | TDD-8   | JGBF-8  | JETBPY-8 | JBTPR-8 |
| BTPR-8           | JSD-8   | TT-8    | ETBPY-8  |         |
| ABOXIY           | ,       | 31.484, | 23.014,  | 16.236, |
| 0.910,           | 1.730,  | 15.113, | 28.116,  | 2.455,  |
| 4.606,           | 10.582, | 23.994  |          | 9.768,  |
|                  |         |         |          | 1.605,  |

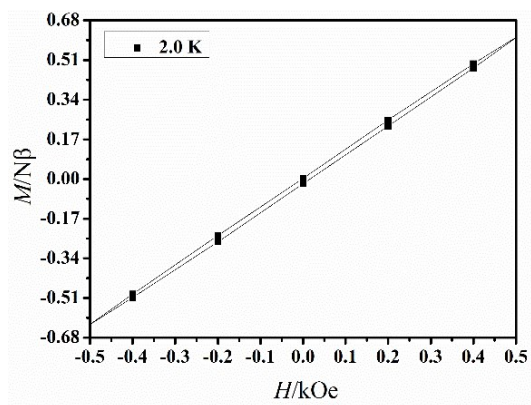

(a)

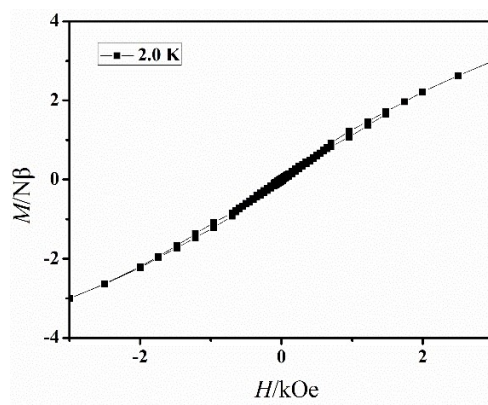

(b)

**Fig. S1** Magnetic hysteresis loops for compounds **1** (a) and **3** (b), respectively.

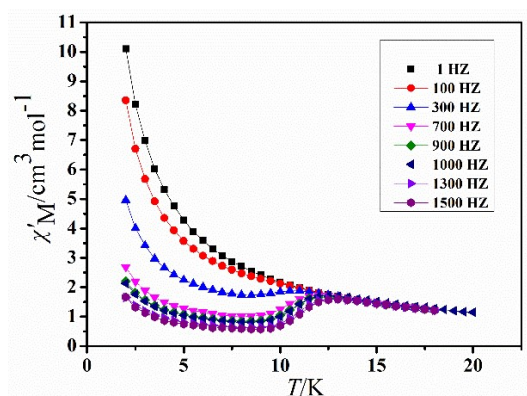

(a)

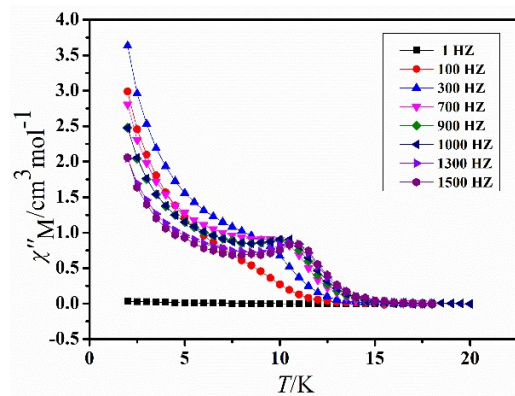

(b)

**Fig. S2** Temperature dependence of the in-phase ( $\chi'$ , a) and out-of-phase ( $\chi''$ , b) ac susceptibility signals under 0 Oe dc field for **1**.

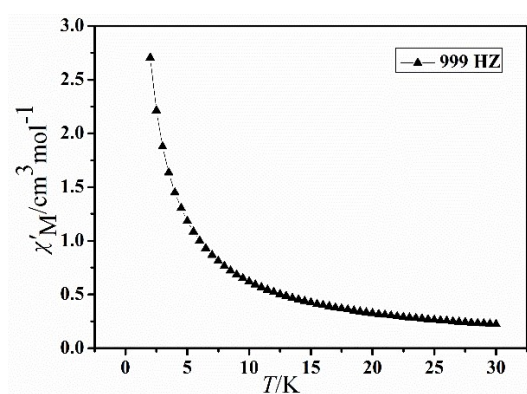

(b)

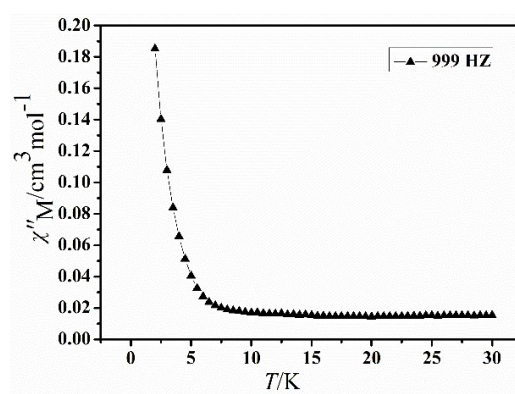

(a)

**Fig. S3** Temperature dependence of the in-phase ( $\chi'$ , a) and out-of-phase ( $\chi''$ , b) ac susceptibility signals under 0 Oe dc field for **2**.

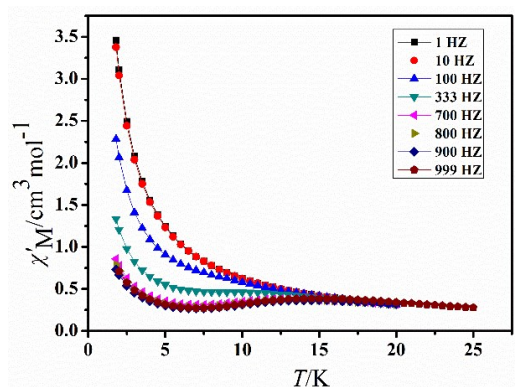

(a)

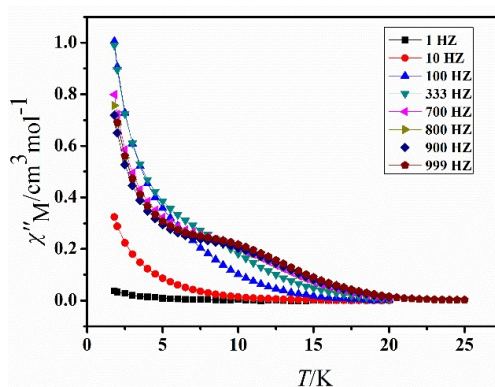

(b)

**Fig. S4** Temperature dependence of the in-phase ( $\chi'$ , a) and out-of-phase ( $\chi''$ , b) ac susceptibility signals under 0 Oe dc field for **3**.

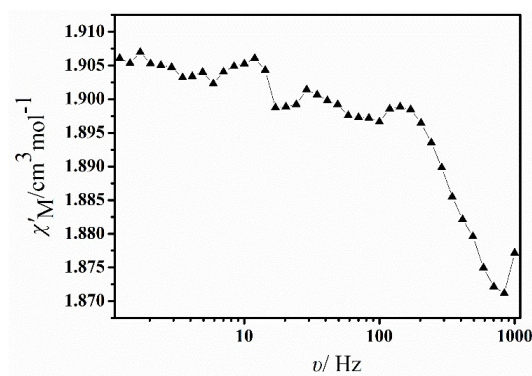

(a)

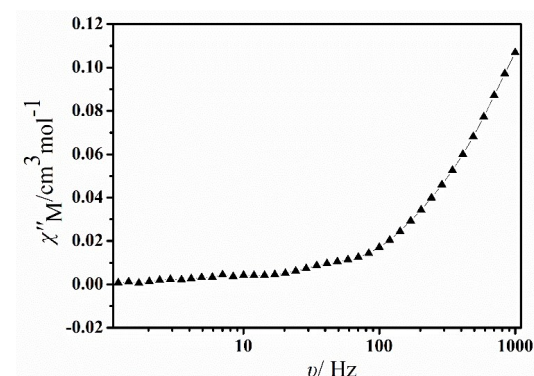

(b)

**Fig. S5** Plots of the frequency-dependent in-phase (a) and out-of-phase (b) ac susceptibility at indicated temperatures for **2**.

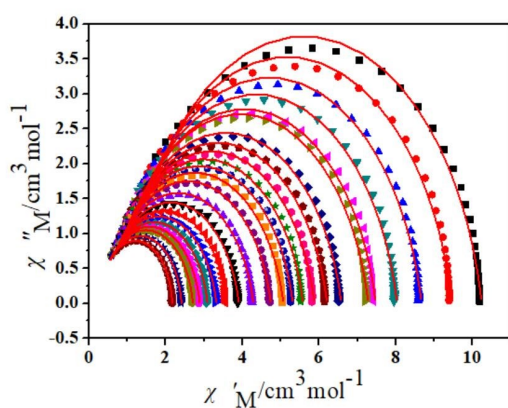

(a)

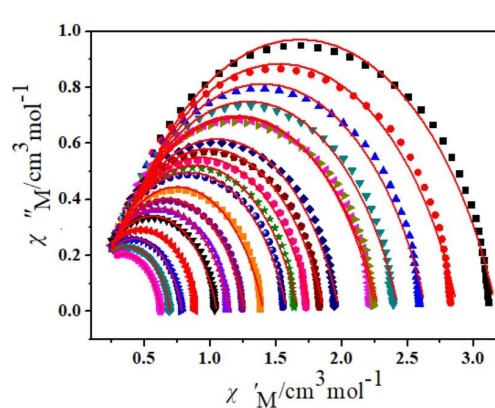

(b)

**Fig. S6** Cole–Cole diagrams with red solid lines as Debye fits for **1** (a) and **3** (b), respectively.

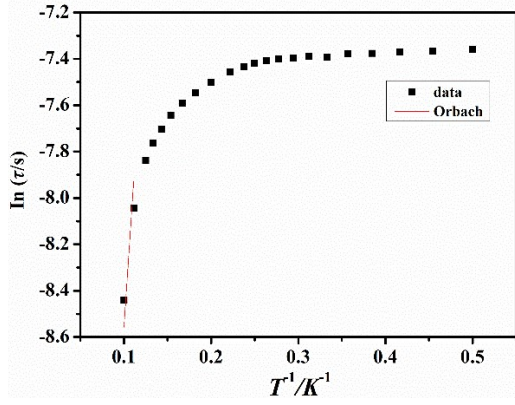

(a)

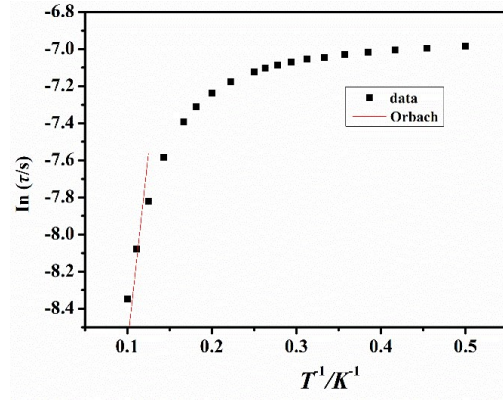

(b)

**Fig. S7** Fitting of frequency dependence of relaxation time under 0 Oe dc field for **1** (a) and **3** (d).

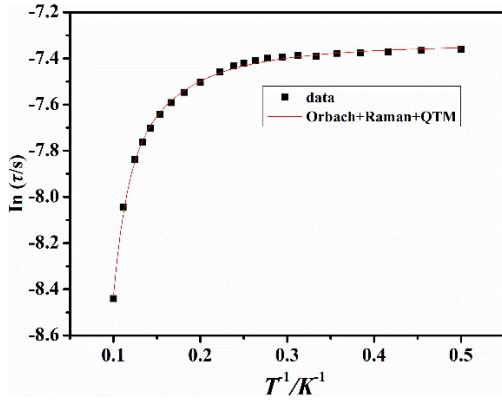

(a)

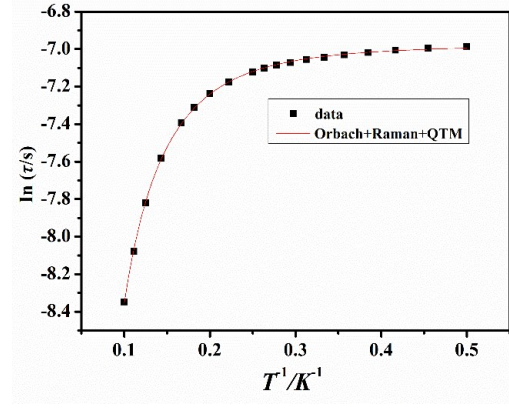

(b)

**Fig. S8** Fitting of frequency dependence of relaxation time under 0 Oe dc field for **1** (a) and **3** (b).

#### 4. Relaxation fitting parameters of **1** and **3**

The magnetic susceptibility data of **1** and **3** under a zero dc field were described by the modified Debye functions:

$$\chi'(\omega) = \chi_S + (\chi_T - \chi_S) \frac{1 + (\omega\tau)^{1-\alpha} \sin\left(\frac{\pi}{2}\alpha\right)}{1 + 2(\omega\tau)^{1-\alpha} \sin\left(\frac{\pi}{2}\alpha\right) + (\omega\tau)^{(2-2\alpha)}}$$

$$\chi''(\omega) = (\chi_T - \chi_S) \frac{(\omega\tau)^{1-\alpha} \cos\left(\frac{\pi}{2}\alpha\right)}{1 + 2(\omega\tau)^{1-\alpha} \sin\left(\frac{\pi}{2}\alpha\right) + (\omega\tau)^{(2-2\alpha)}}$$

$$\chi''_{\omega=\tau^{-1}} = (\chi_T - \chi_S) \frac{\cos(\frac{\pi}{2}\alpha)}{2 + 2\sin(\frac{\pi}{2}\alpha)} = \frac{1}{2}(\chi_T - \chi_S) \tan \frac{\pi}{4}(1 - \alpha)$$

**Table S6** Relaxation fitting parameters from Least-Squares Fitting of  $\chi(\omega)$  data for **1** under a zero applied dc field.

| $T$ | $\Delta\chi_1$ (cm <sup>3</sup> mol <sup>-1</sup> ) | $\Delta\chi_2$ (cm <sup>3</sup> mol <sup>-1</sup> ) | $\tau$ (s)   | $\alpha$     |
|-----|-----------------------------------------------------|-----------------------------------------------------|--------------|--------------|
| 2   | 0.983532E+00                                        | 0.102372E+02                                        | 0.636214E-03 | 0.120707E+00 |
| 2.2 | 0.877062E+00                                        | 0.946374E+01                                        | 0.632538E-03 | 0.124239E+00 |
| 2.4 | 0.770546E+00                                        | 0.866756E+01                                        | 0.629372E-03 | 0.126738E+00 |
| 2.6 | 0.698238E+00                                        | 0.803123E+01                                        | 0.626111E-03 | 0.128596E+00 |
| 2.8 | 0.641316E+00                                        | 0.747214E+01                                        | 0.625104E-03 | 0.129681E+00 |
| 3   | 0.624238E+00                                        | 0.728084E+01                                        | 0.616214E-03 | 0.129649E+00 |
| 3.2 | 0.550759E+00                                        | 0.657650E+01                                        | 0.618803E-03 | 0.132735E+00 |
| 3.4 | 0.512913E+00                                        | 0.620566E+01                                        | 0.614080E-03 | 0.134195E+00 |
| 3.6 | 0.493857E+00                                        | 0.587573E+01                                        | 0.611164E-03 | 0.133591E+00 |
| 3.8 | 0.470212E+00                                        | 0.558001E+01                                        | 0.605921E-03 | 0.134295E+00 |
| 4   | 0.450917E+00                                        | 0.531156E+01                                        | 0.598924E-03 | 0.133974E+00 |
| 4.2 | 0.432325E+00                                        | 0.506660E+01                                        | 0.591299E-03 | 0.134823E+00 |
| 4.5 | 0.405041E+00                                        | 0.474123E+01                                        | 0.577360E-03 | 0.135353E+00 |
| 5   | 0.369947E+00                                        | 0.428356E+01                                        | 0.551649E-03 | 0.134736E+00 |
| 5.5 | 0.350855E+00                                        | 0.390603E+01                                        | 0.527635E-03 | 0.130152E+00 |
| 6   | 0.338212E+00                                        | 0.358603E+01                                        | 0.504476E-03 | 0.125414E+00 |
| 6.5 | 0.311197E+00                                        | 0.331829E+01                                        | 0.479174E-03 | 0.120318E+00 |
| 7   | 0.296681E+00                                        | 0.308618E+01                                        | 0.451865E-03 | 0.114586E+00 |
| 7.5 | 0.280323E+00                                        | 0.288362E+01                                        | 0.425154E-03 | 0.105898E+00 |
| 8   | 0.263316E+00                                        | 0.270553E+01                                        | 0.394531E-03 | 0.961469E-01 |
| 9   | 0.248838E+00                                        | 0.240956E+01                                        | 0.320753E-03 | 0.715124E-01 |
| 10  | 0.246896E+00                                        | 0.216867E+01                                        | 0.215905E-03 | 0.446681E-01 |

**Table S7** Relaxation fitting parameters from Least-Squares Fitting of  $\chi(\omega)$  data for **3** under a zero applied dc field.

| $T$ | $\Delta\chi_1$ (cm <sup>3</sup> mol <sup>-1</sup> ) | $\Delta\chi_2$ (cm <sup>3</sup> mol <sup>-1</sup> ) | $\tau$ (s)    | $\alpha$     |
|-----|-----------------------------------------------------|-----------------------------------------------------|---------------|--------------|
| 2   | 0.185550E+00                                        | 0.317884E+01                                        | 0.925102E-03  | 0.266784E+00 |
| 2.2 | 0.170850E+00                                        | 0.288622E+01                                        | 0.916392E-03  | 0.264696E+00 |
| 2.4 | 0.158753E+00                                        | 0.264416E+01                                        | 0.907133E-03  | 0.262524E+00 |
| 2.6 | 0.145156E+00                                        | 0.243583E+01                                        | 0.895439E-03  | 0.261895E+00 |
| 2.8 | 0.138553E+00                                        | 0.226293E+01                                        | 0.885056E-03  | 0.258568E+00 |
| 3   | 0.136412E+00                                        | 0.228612E+01                                        | 0.8719226E-03 | 0.271652E+00 |

|     |              |              |              |              |
|-----|--------------|--------------|--------------|--------------|
| 3.2 | 0.123162E+00 | 0.198348E+01 | 0.862860E-03 | 0.255475E+00 |
| 3.4 | 0.116027E+00 | 0.186665E+01 | 0.849252E-03 | 0.253949E+00 |
| 3.6 | 0.111270E+00 | 0.176254E+01 | 0.836905E-03 | 0.251964E+00 |
| 3.8 | 0.106701E+00 | 0.166932E+01 | 0.822410E-03 | 0.249706E+00 |
| 4   | 0.102304E+00 | 0.158522E+01 | 0.807290E-03 | 0.247897E+00 |
| 4.5 | 0.930493E-01 | 0.140774E+01 | 0.765119E-03 | 0.242585E+00 |
| 5   | 0.864061E-01 | 0.126604E+01 | 0.719709E-03 | 0.236547E+00 |
| 5.5 | 0.810821E-01 | 0.114932E+01 | 0.668790E-03 | 0.229794E+00 |
| 6   | 0.768344E-01 | 0.105254E+01 | 0.615543E-03 | 0.223005E+00 |
| 7   | 0.734337E-01 | 0.900058E+00 | 0.509261E-03 | 0.208746E+00 |
| 8   | 0.688963E-01 | 0.786364E+00 | 0.401615E-03 | 0.199448E+00 |
| 9   | 0.716034E-01 | 0.697934E+00 | 0.310514E-03 | 0.191284E+00 |
| 10  | 0.777849E-01 | 0.627784E+00 | 0.237063E-03 | 0.186805E+00 |

## Theoretical methods and computational details

This section is supposed to be included in ESI.

Multiconfigurational *ab initio* calculations, including spin-orbit coupling (SOC), were performed on the experimental structures of the complexes here to explore their SMM properties. This type of calculation includes two steps: <sup>1</sup> 1) a set of spin eigenstates, are obtained by the state-averaged (SA) CASSCF method; <sup>2</sup> 2) the low-lying SOC states, i.e., Kramers doublets (KD) herein, are obtained by state interaction which is the diagonalization of the SOC matrix in the space spanned by the spin eigenstates from the first step. In the CASSCF step, the active space consisted of 9 electrons in 7 orbitals and all the spin eigenstates of 21 sextets were included. Due to the hardware limitation, other highly excited quartets and doublets were not considered. The step of state interaction were performed by the RASSI-SO module <sup>3</sup> with the SOC integrals from the AMFI method. <sup>4</sup> The ANO-RCC basis sets, <sup>5-7</sup> including VTZP for Dy, VDZ for C and H as well as VDZP for other atoms, were used. All the calculations were carried out with the MOLCAS@UU, a version of MOLCAS 8.0<sup>10,11</sup> which is freely distributed for academic users. The SINGLE ANISO module <sup>8,9</sup>, developed by Chibotaru and et al, was used to obtain the g-tensors, transition magnetic moments ameters characterizing the magnetic anisotropy.

## References

- [1] Javier Luzón and Roberta Sessoli. Lanthanides in molecular magnetism: so fascinating, so challenging. *Dalton Trans*, 41:13556–13567, 2012.
- [2] Björn O. Roos, Peter R. Taylor, and Per. E. M. Siegbahn. A COMPLETE ACTIVE SPACE SCF METHOD (CASSCF) USING A DENSITY MATRIX FORMULATED SUPER-CI APPROACH. *Chem Phys*, 48:157–173, 1980.
- [3] Per-åke Malmqvist, Björn O. Roos, and Bernd Schimmelpfennig. The restricted active space (RAS) state interaction approach with spin-orbit coupling. *Chem Phys Lett*, 357:230–240, 2002.
- [4] Bernd A Hess, Christel M Marian, Ulf Wahlgren, and Odd Gropen. A mean-field spin-orbit method applicable to correlated wavefunctions. *Chem Phys Lett*, 251:365–371, 1996.
- [5] Björn O. Roos, Roland Lindh, Per-åke Malmqvist, Valera Veryazov, and Per-Olof Widmark. Main Group Atoms and Dimers Studied with a New Relativistic ANO Basis Set. *J Phys Chem A*, 108(15):2851–2858, 2004.
- [6] Björn O. Roos, Roland Lindh, Per-åke Malmqvist, Valera Veryazov, and Per-Olof Widmark. New Relativistic ANO Basis Sets for Transition Metal Atoms. *J Phys Chem A*, 109(29):6575–6579, 2005.
- [7] Björn O. Roos, Roland Lindh, Per-åke Malmqvist, Valera Veryazov, Per-Olof Widmark, and Antonio Carlos Borin. New Relativistic Atomic Natural Orbital Basis Sets for Lanthanide Atoms with Applications to the Ce Diatom and LuF<sub>3</sub>. *J Phys Chem A*, 112(45):11431–11435, 2008.
- [8] Liviu F Chibotaru and Liviu Ungur. Ab initio calculation of anisotropic magnetic properties of complexes. I. Unique definition of pseudospin Hamiltonians and their derivation. *J Chem Phys*, 137:064112, 2012.
- [9] Liviu F Chibotaru. AB INITIO METHODOLOGY FOR PSEUDOSPIN HAMILTONIANS OF ANISOTROPIC MAGNETIC COMPLEXES. *Adv Chem Phys*, 153:397–519, 2013.

[10] Francesco Aquilante, Luca De Vico, Nicolas Ferré, Giovanni Ghigo, Per-åke Malmqvist, Pavel Neogrády, Thomas Bondo Pedersen, Michal Pitoňák, Markus Reiher, Björn O. Roos, Luis Serrano-Andrés, Miroslav Urban, Valera Veryazov, and Roland Lindh. Molcas 7: The next generation. *J Comput Chem*, 31(1):224–247, 2010.

[11] Francesco Aquilante, Jochen Autschbach, Rebecca K. Carlson, Liviu F. Chibotaru, Mickael G. Delcey, Luca De Vico, Ignacio Fdez. Galván, Nicolas Ferré, Luis Manuel Frutos, Laura Gagliardi, Marco Garavelli, Angelo Giussani, Chad E. Hoyer, Giovanni Li Manni, Hans Lischka, Dongxia Ma, Per-åke Malmqvist, Thomas Müller, Artur Nenov, Massimo Olivucci, Thomas Bondo Pedersen, Daoling Peng, Felix Plasser, Ben Pritchard, Markus Reiher, Ivan Rivalta, Igor Schapiro, Javier Segarra-Martí, Michael Stenrup, Donald G. Truhlar, Liviu Ungur, Alessio Valentini, Steven Vancoillie, Valera Veryazov, Victor P. Vysotskiy, Oliver Weingart, Felipe Zapata, and Roland Lindh. Molcas 8: New capabilities for multiconfigurational quantum chemical calculations across the periodic table. *J Comput Chem*, 37(5):506–541, 2016.
